# Supplementary material
Source: Springer Nature journal article supplement (https://www.springermedizin.de/resource/supplementary/12969_2013_995_MOESM6_ESM.pdf/9589176)

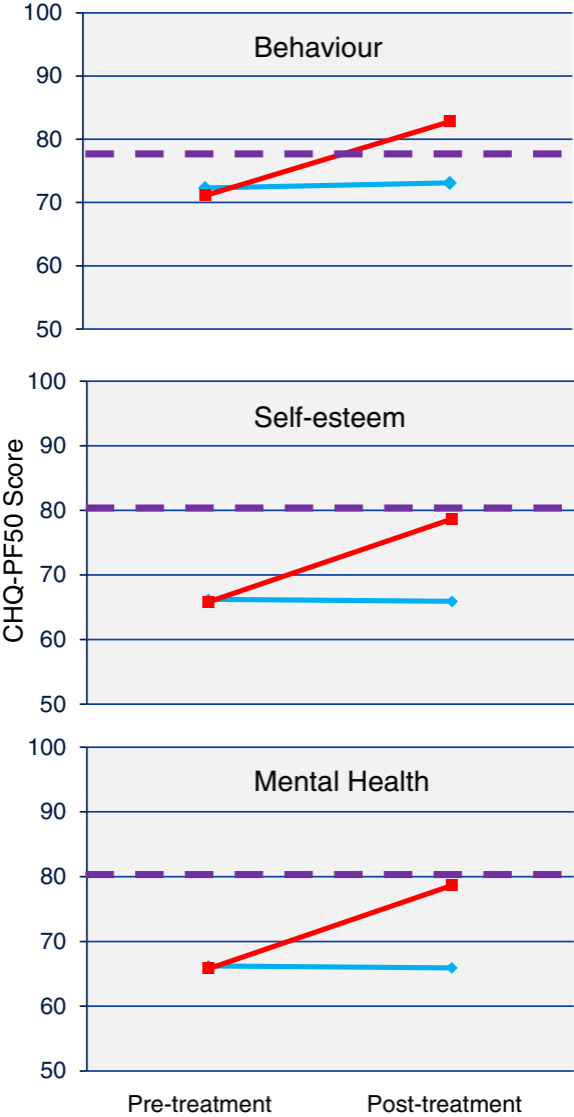

Supplement: MOESM6 [file 9589176]
